# Supplementary material for: Oxidative Cyclization at ortho-Position of Phenol: Improved Total Synthesis of 3-(Phenethylamino)demethyl(oxy)aaptamine
Source: MDPI journal article supplement (doi:10.3390/md21050311), 2023-05-19

## Supporting Information

### **Oxidative Cyclization at *ortho*-Position of Phenol: Improved Total synthesis of 3-(phenethylamino)demethyl(oxy)aaptamine**

Yuki Nakatani, Risa Kimura, Tomoyo Kimata and Naoyuki Kotoku \*

College of Pharmaceutical Sciences, Ritsumeikan University, 1-1-1 Noji-higashi, Kusatsu 525-8577, Shiga, Japan

#### Contents

<sup>1</sup>H- and <sup>13</sup>C-NMR spectra for new compounds: pages S2-S14

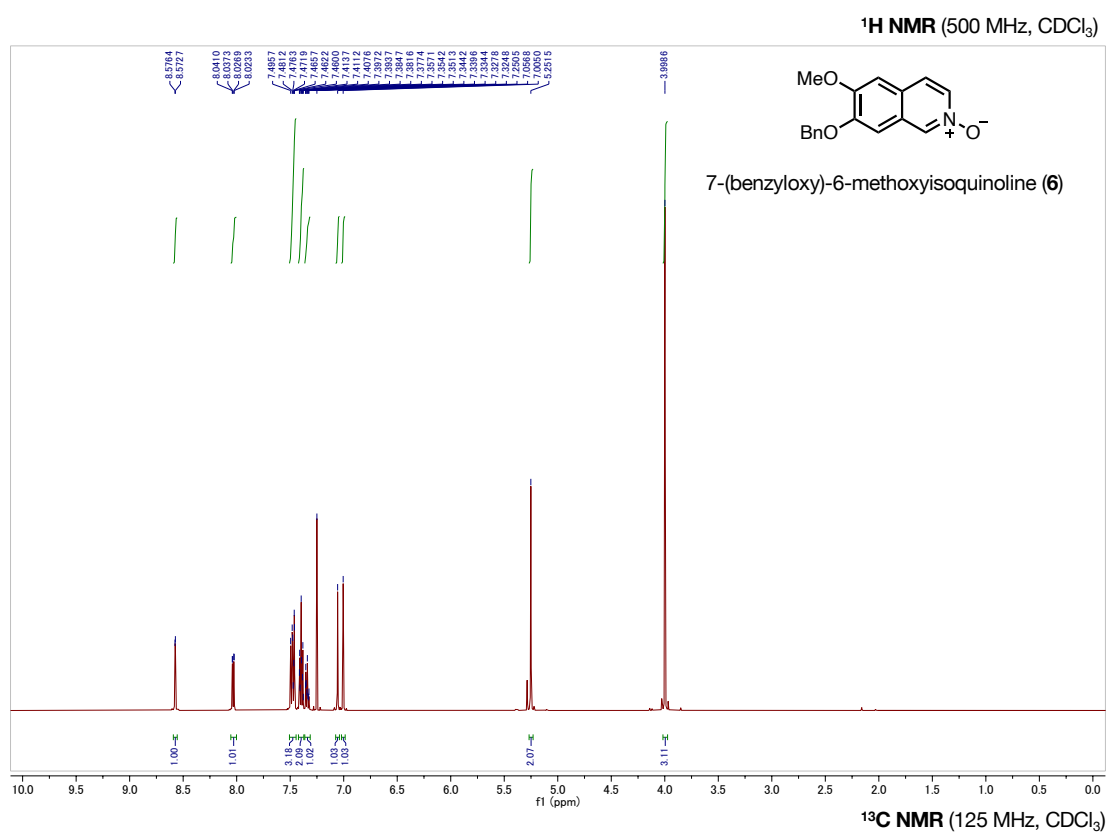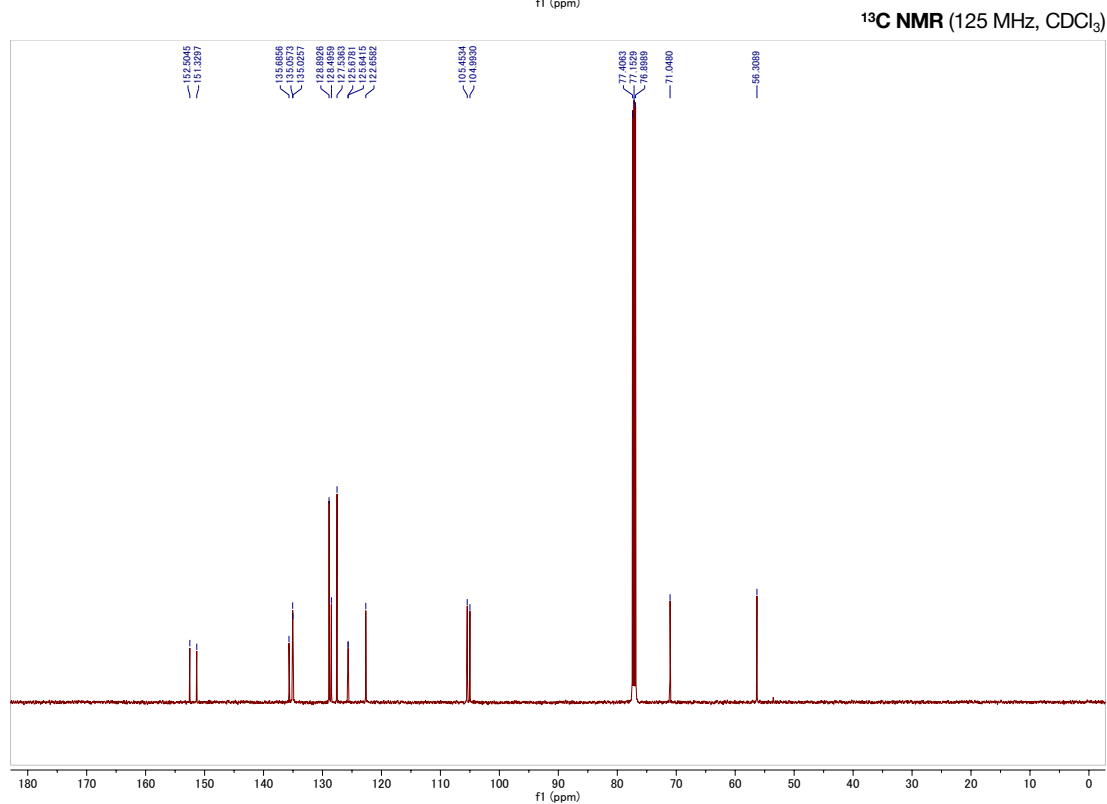

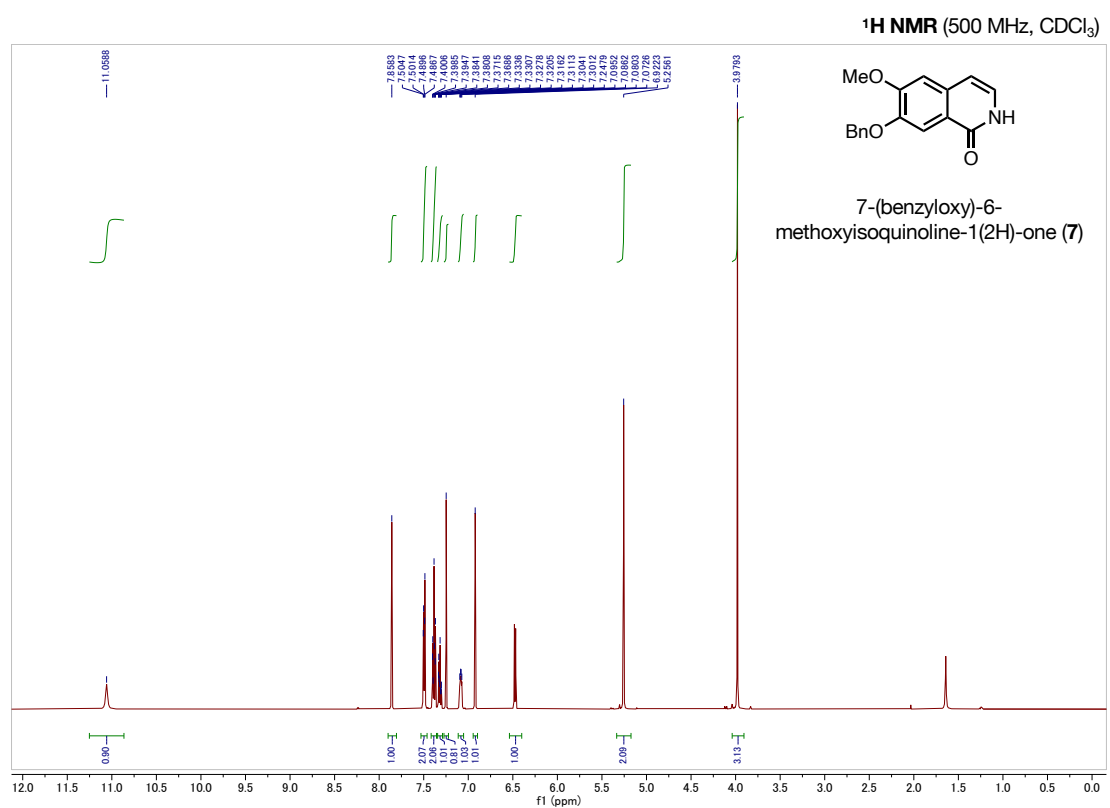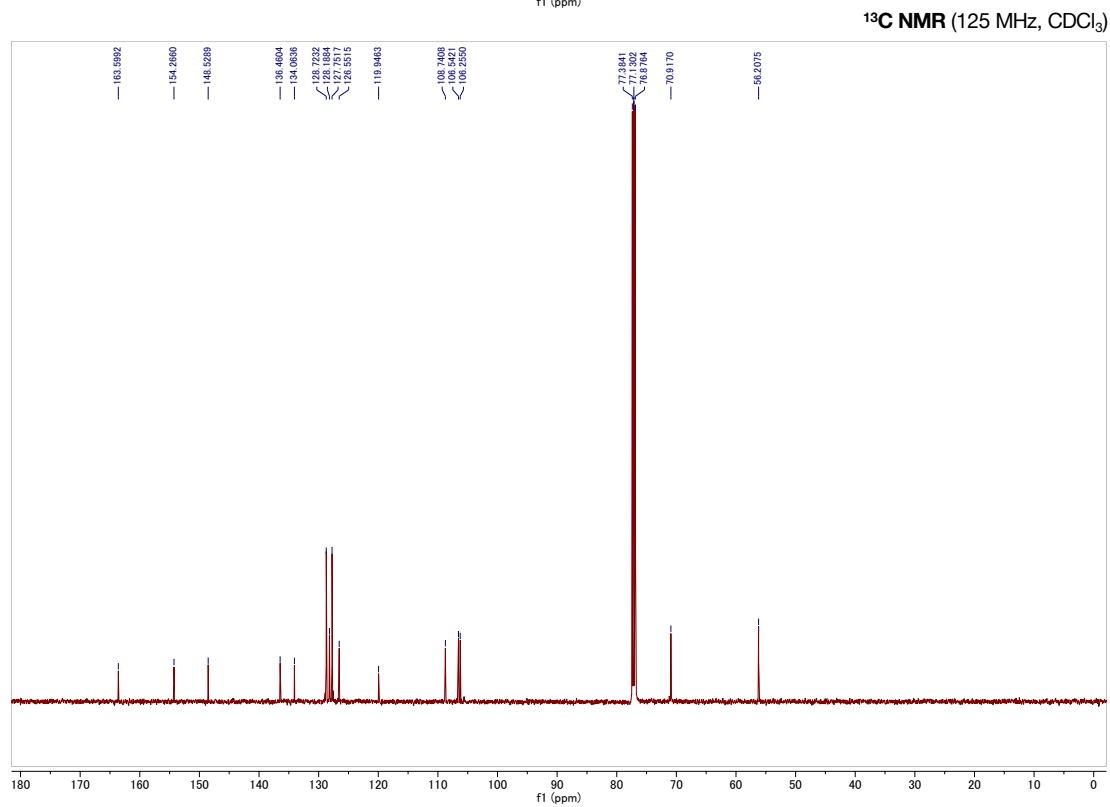

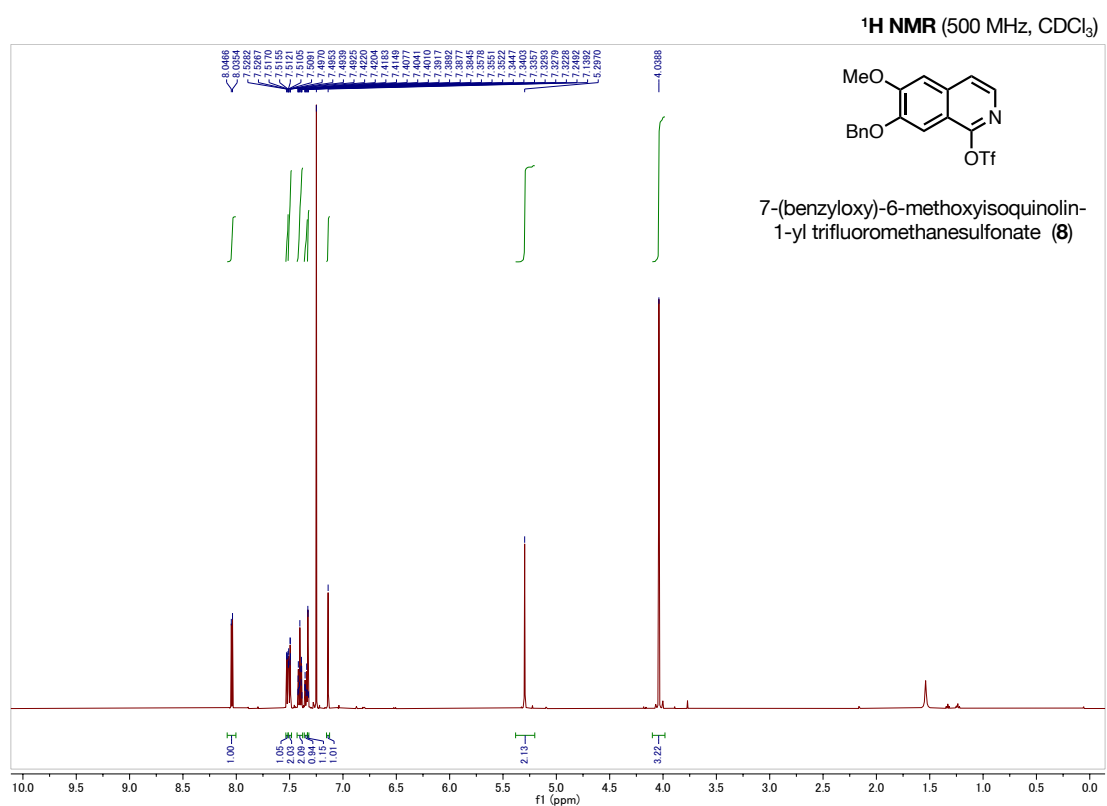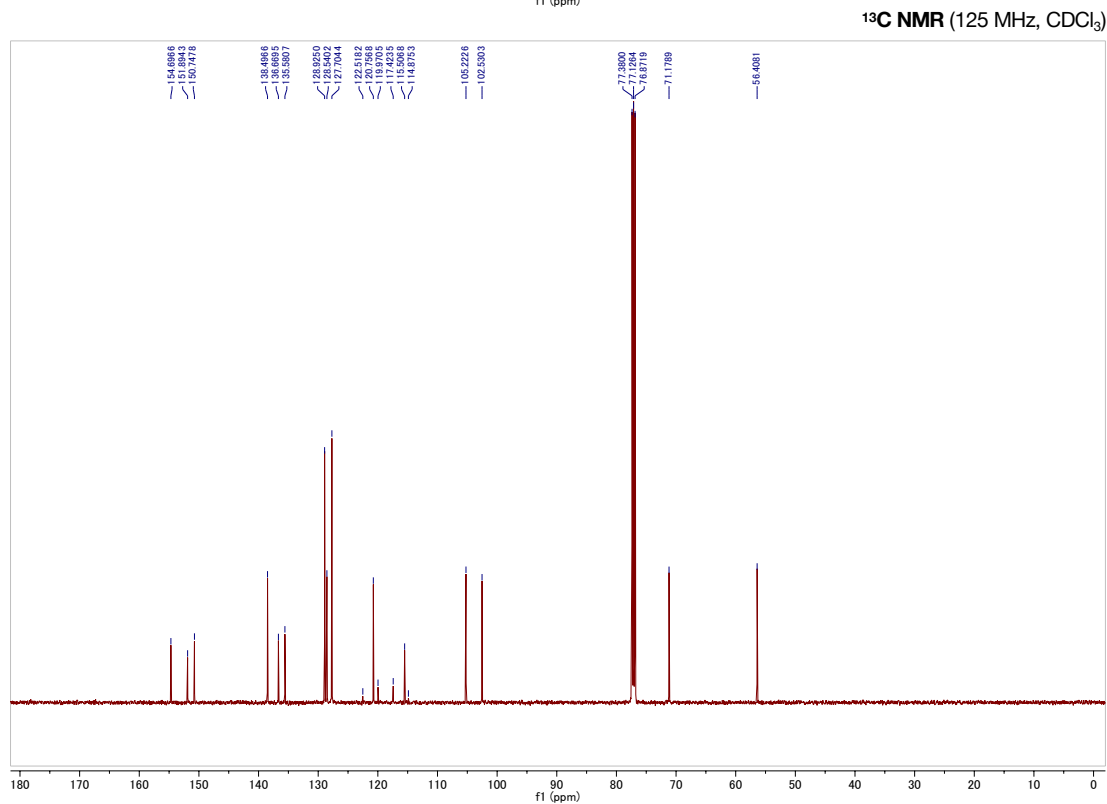

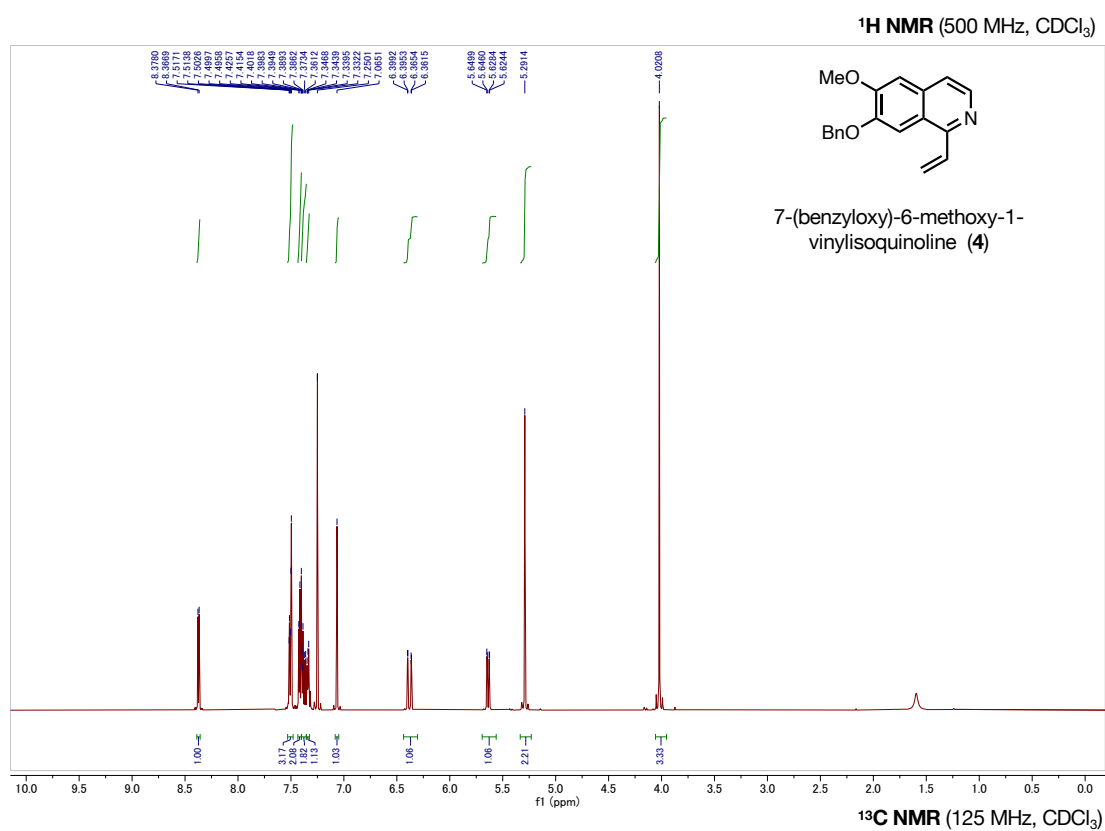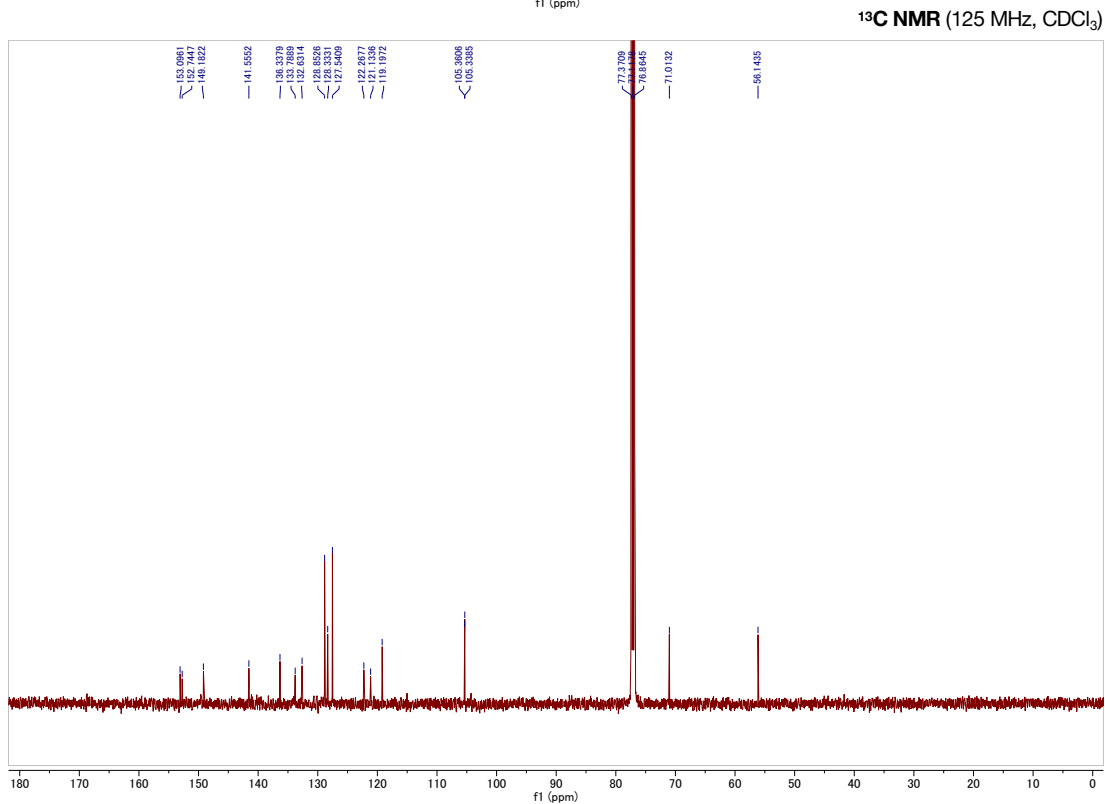

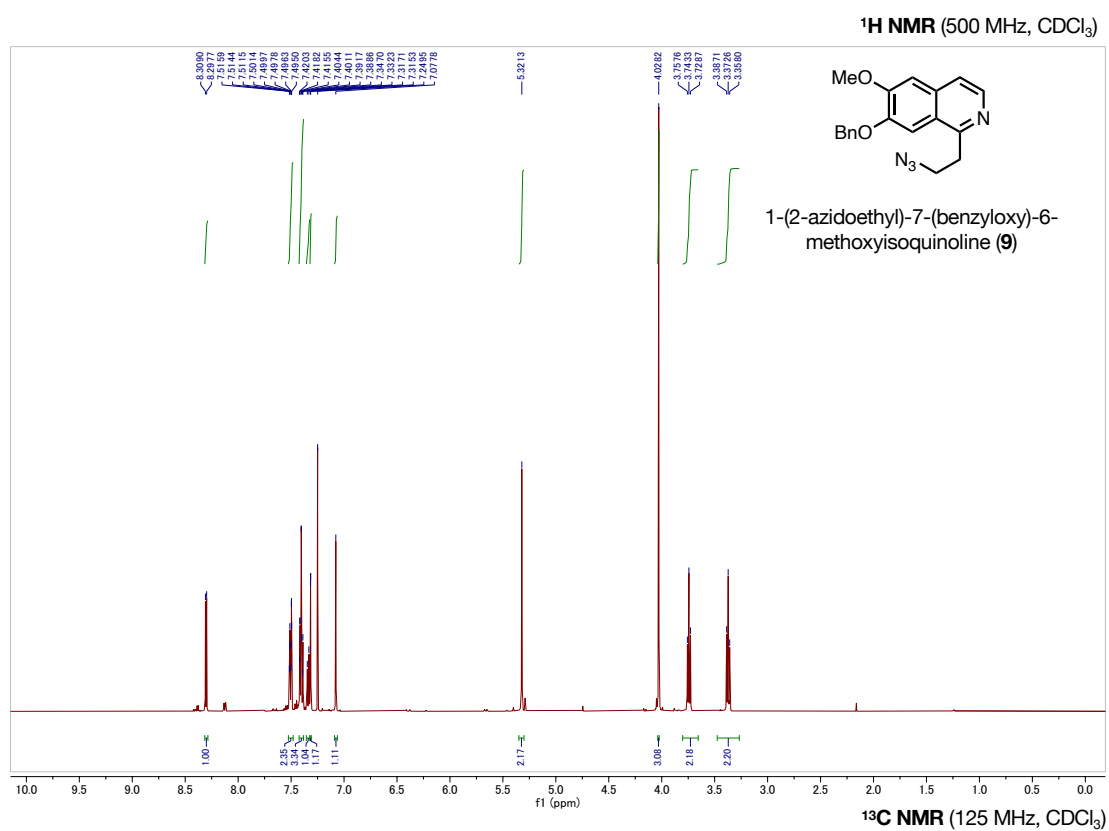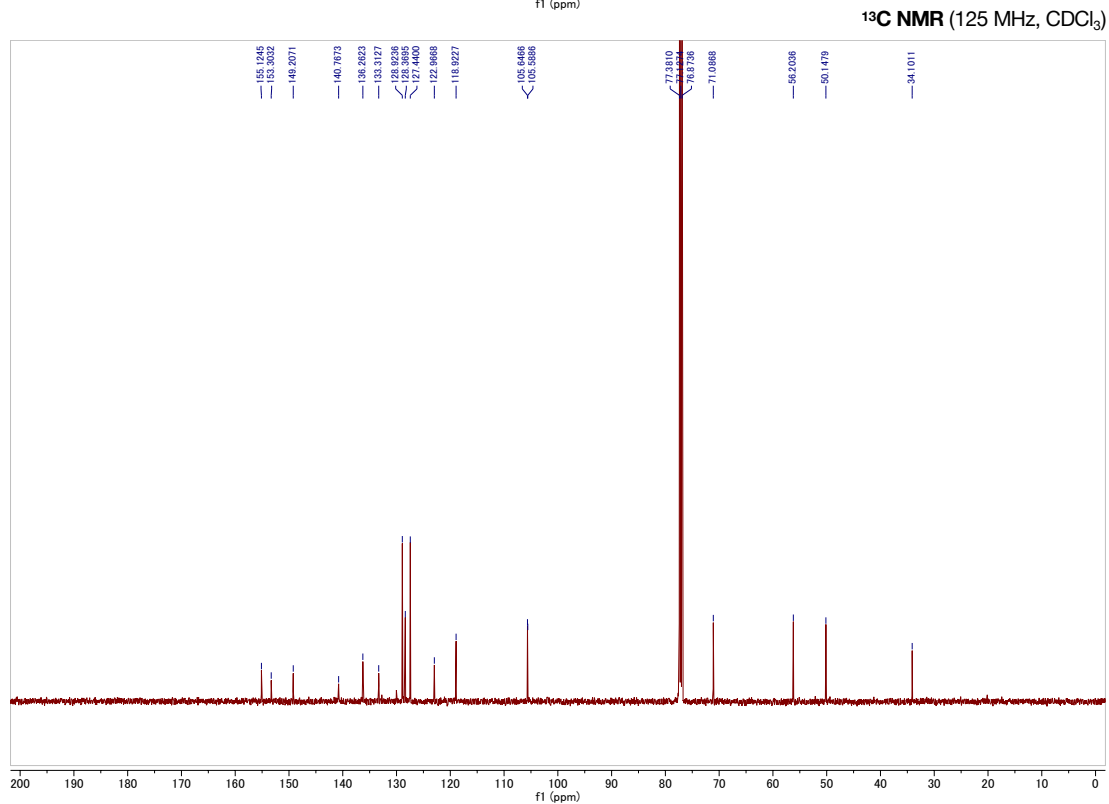

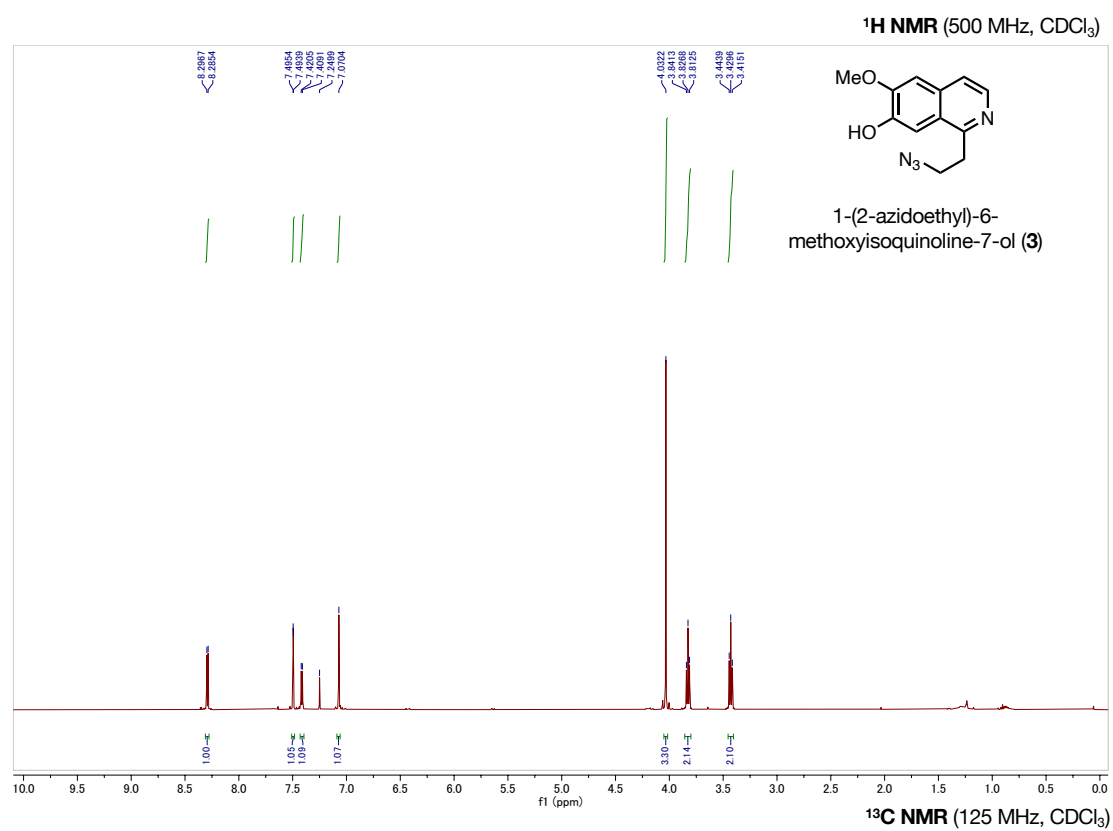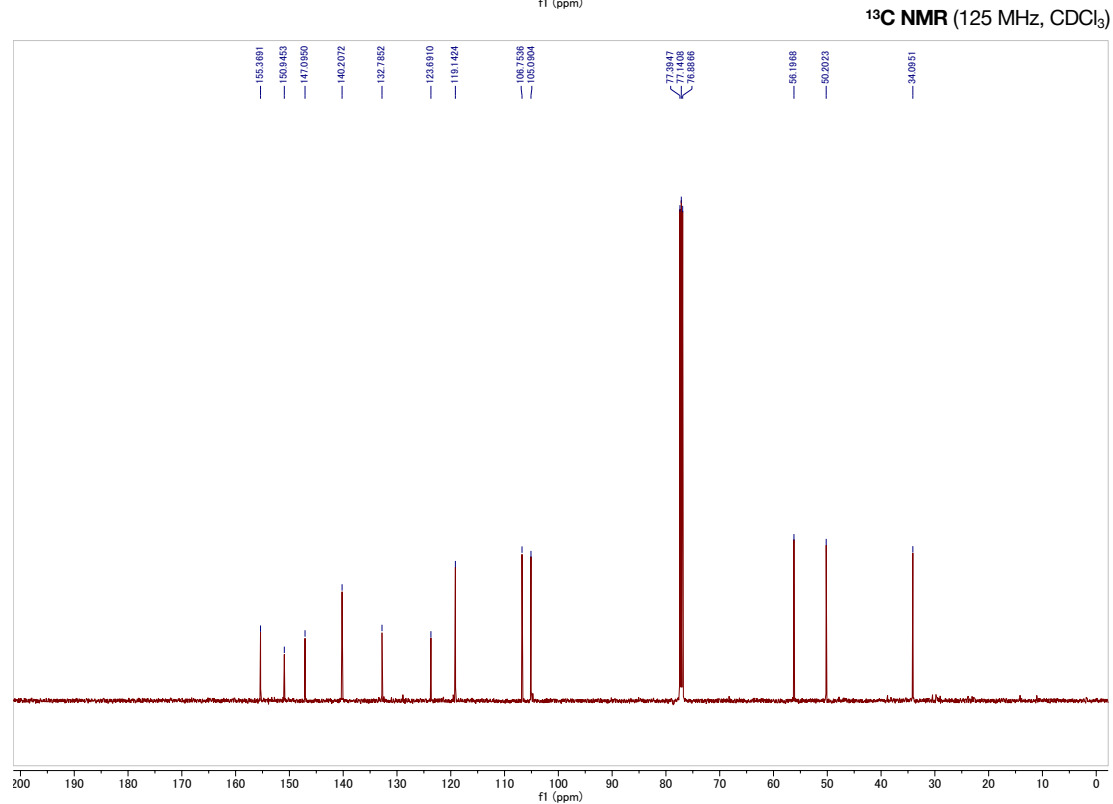

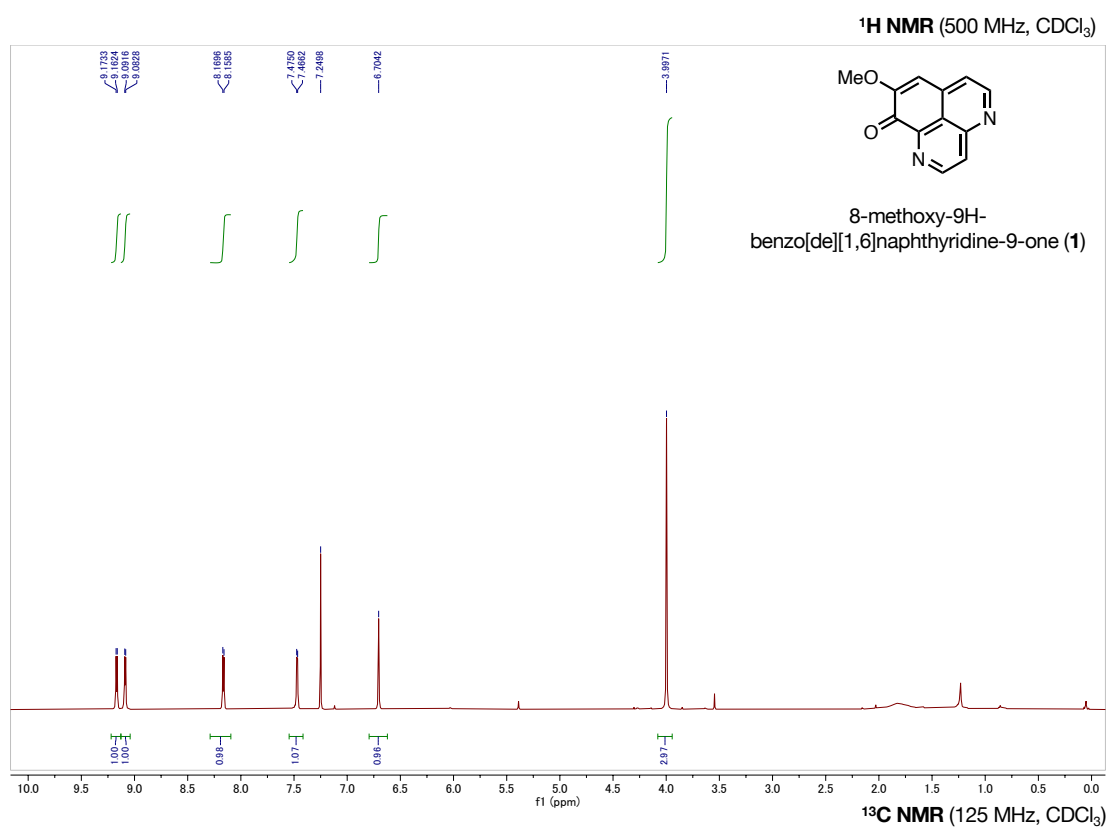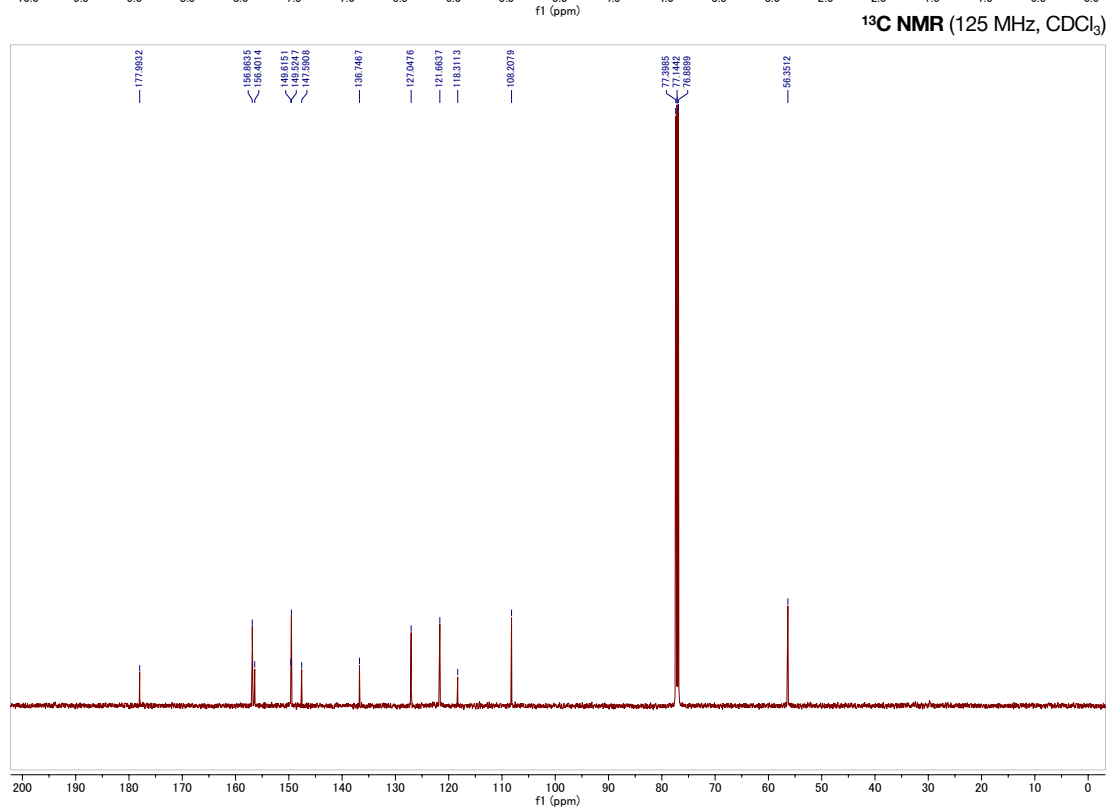

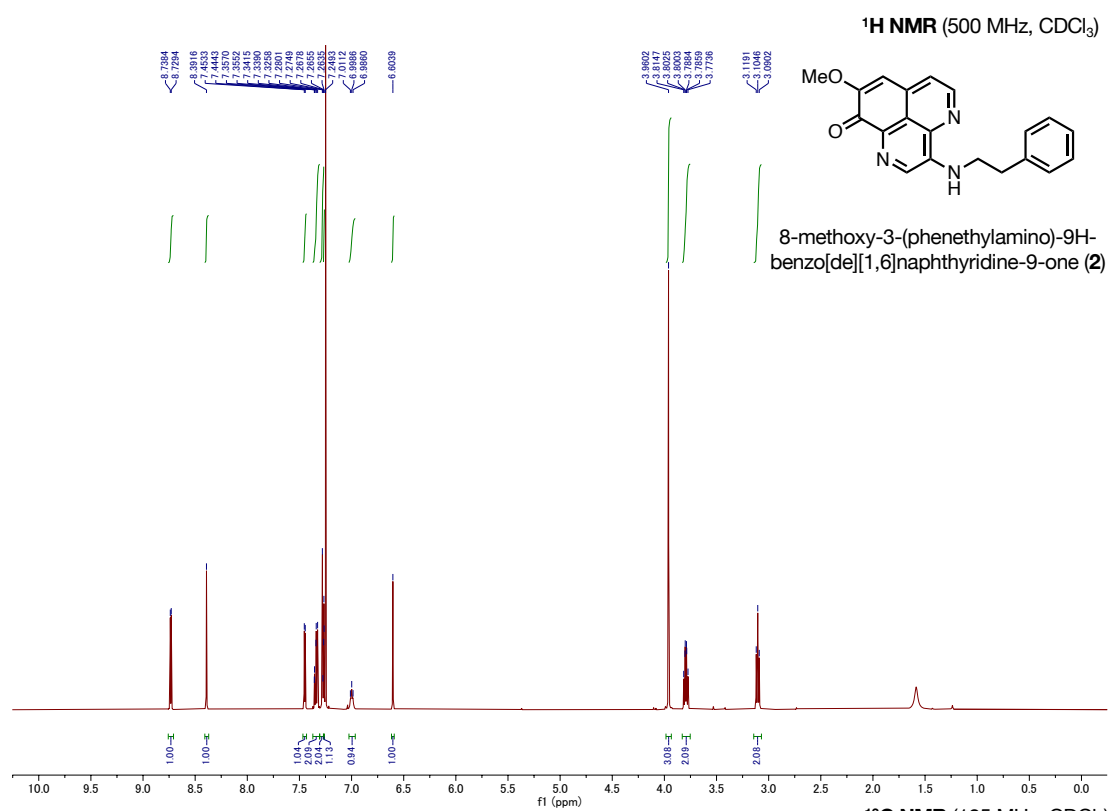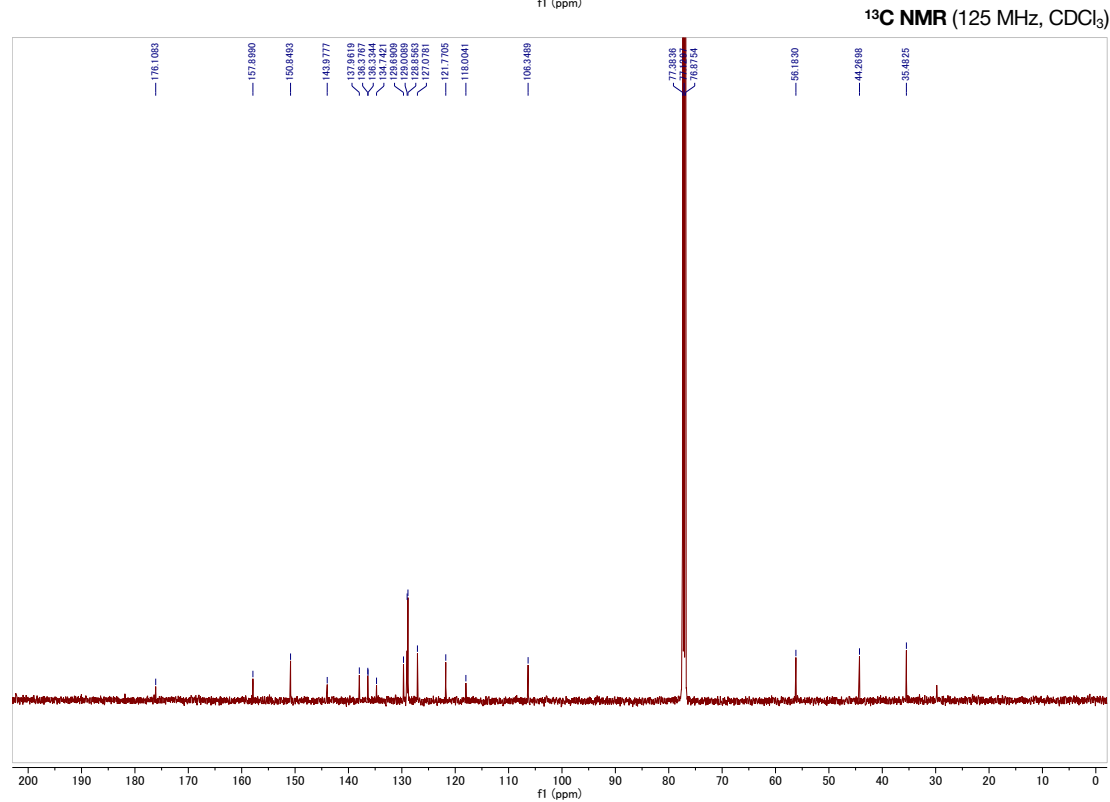

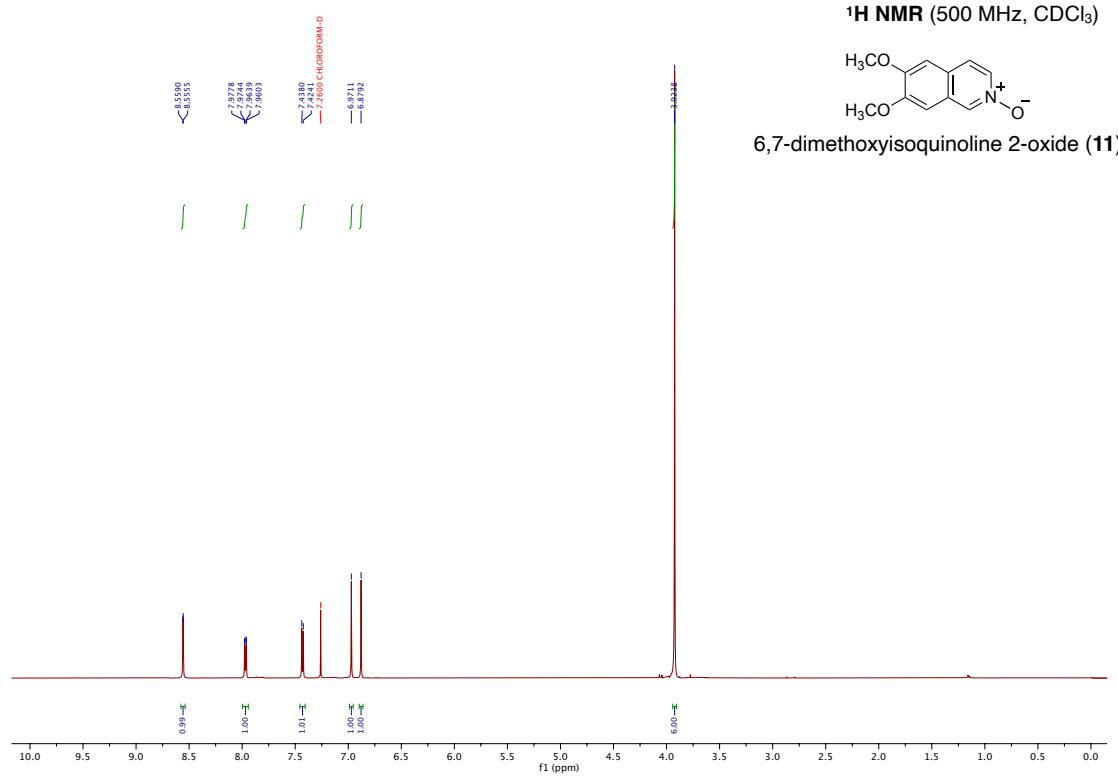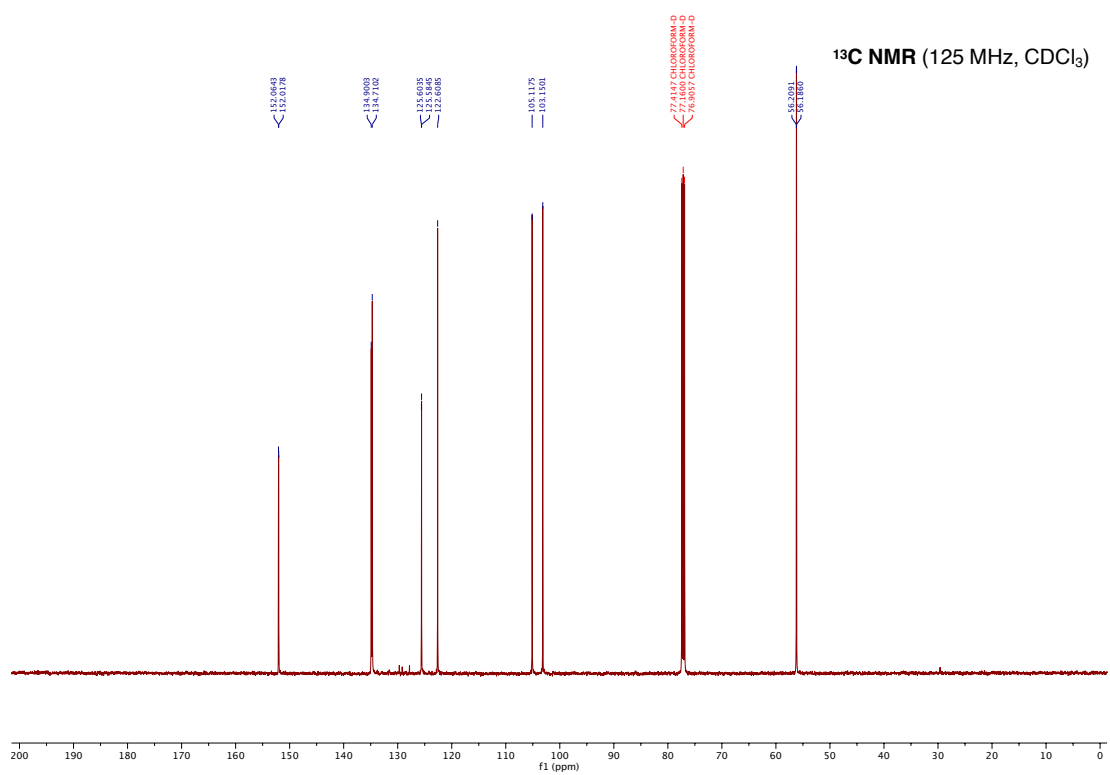

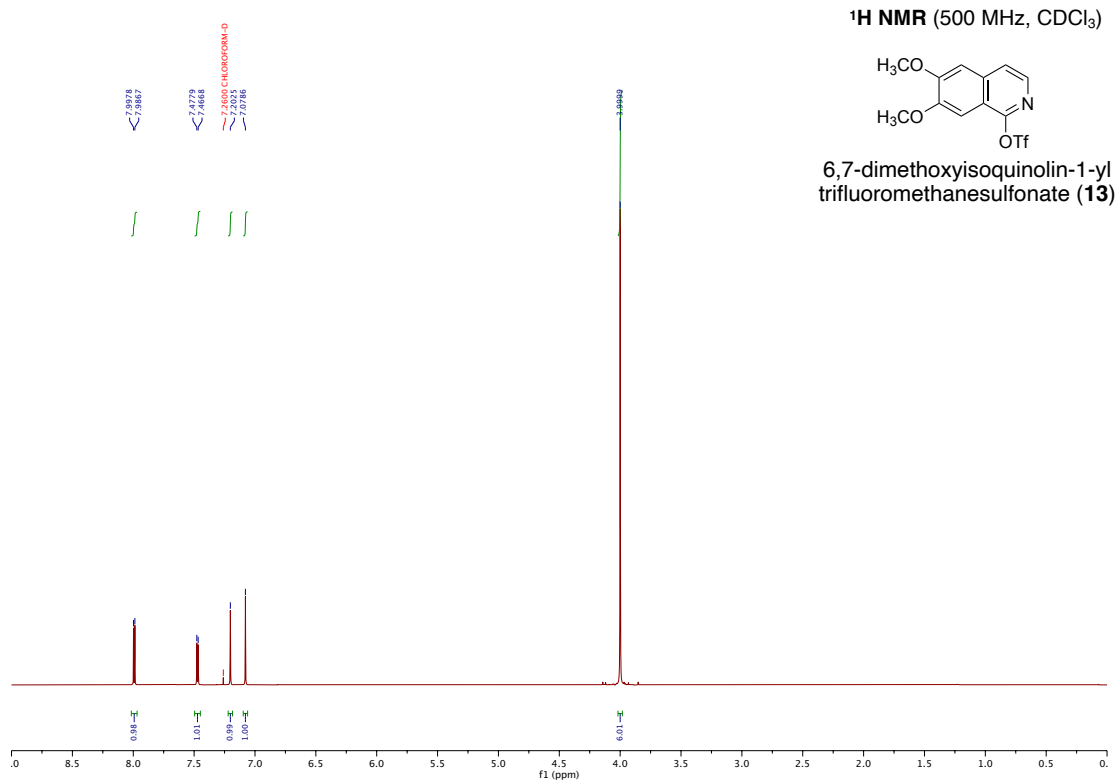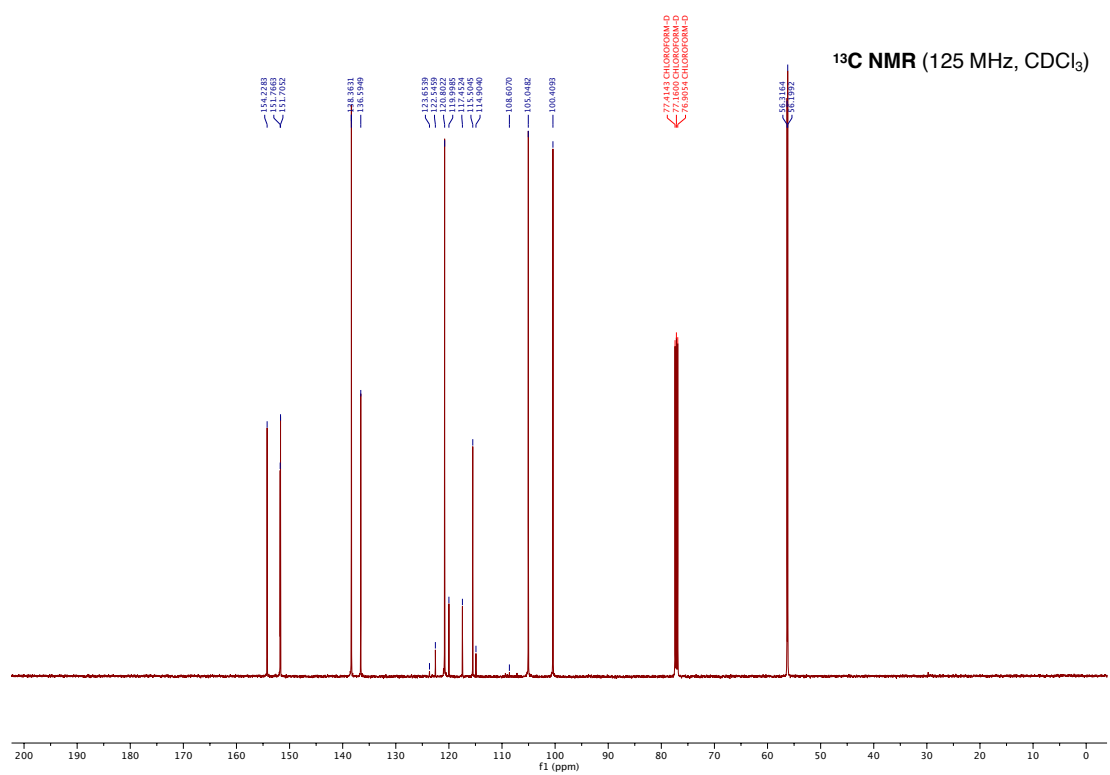

**<sup>1</sup>H NMR** (500 MHz, CDCl<sub>3</sub>)

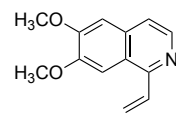

6,7-dimethoxy-1-vinylisoquinoline (**14**)

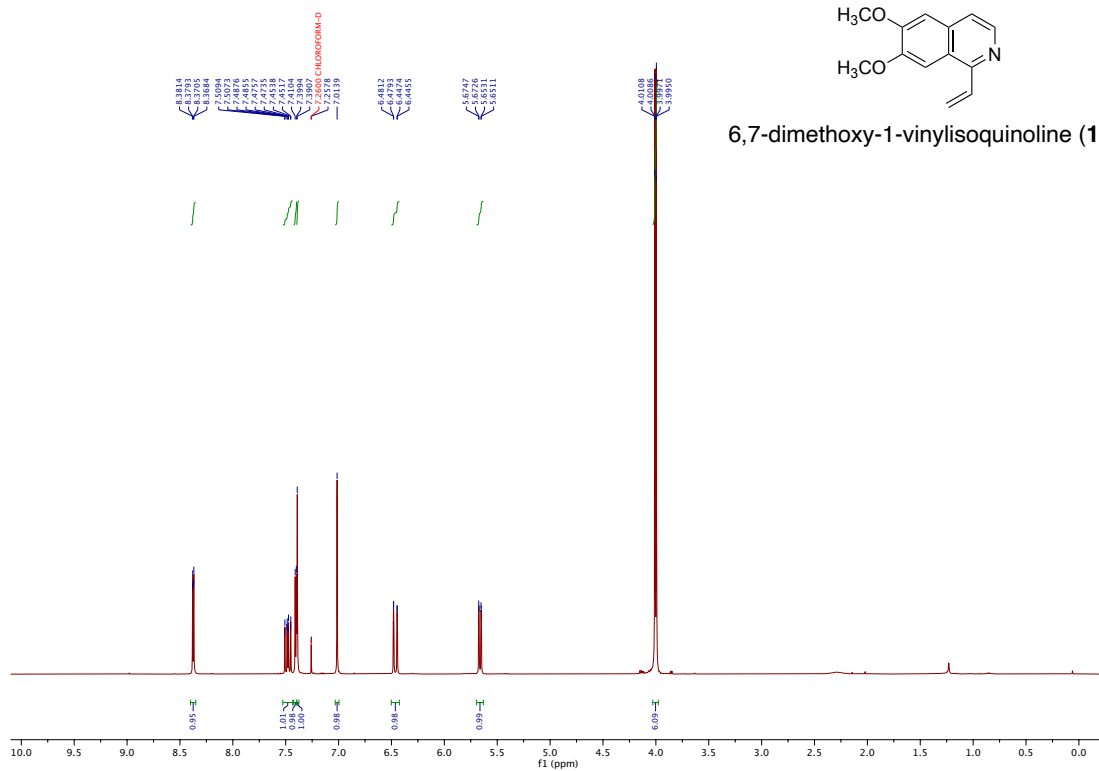

**<sup>13</sup>C NMR** (125 MHz, CDCl<sub>3</sub>)

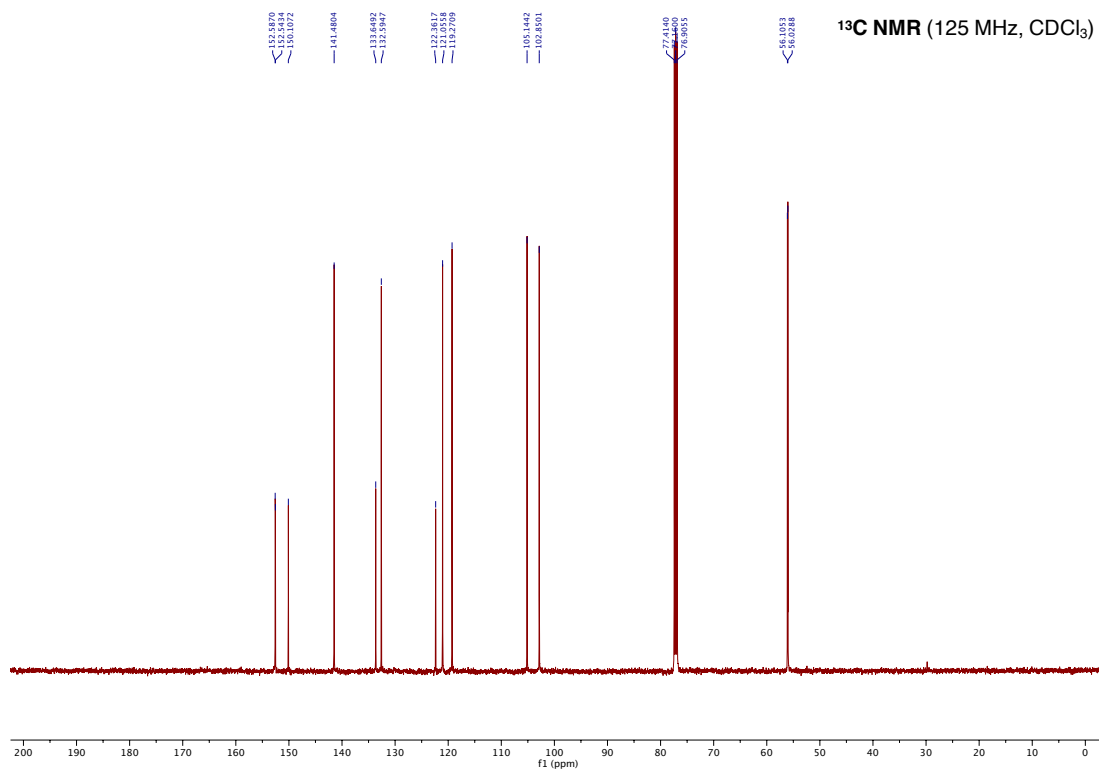

**<sup>1</sup>H NMR** (500 MHz, CDCl<sub>3</sub>)

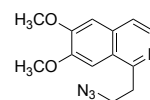

**1-(2-azidoethyl)-6,7-dimethoxyisoquinoline (15)**

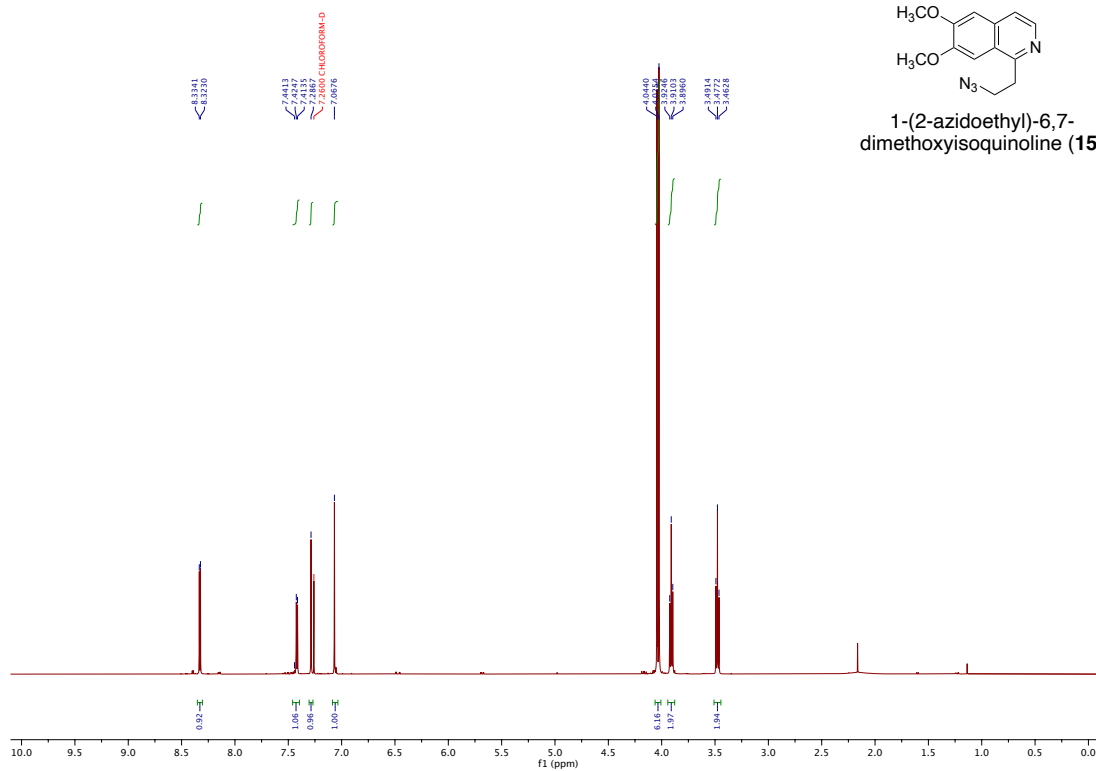

**<sup>13</sup>C NMR** (125 MHz, CDCl<sub>3</sub>)

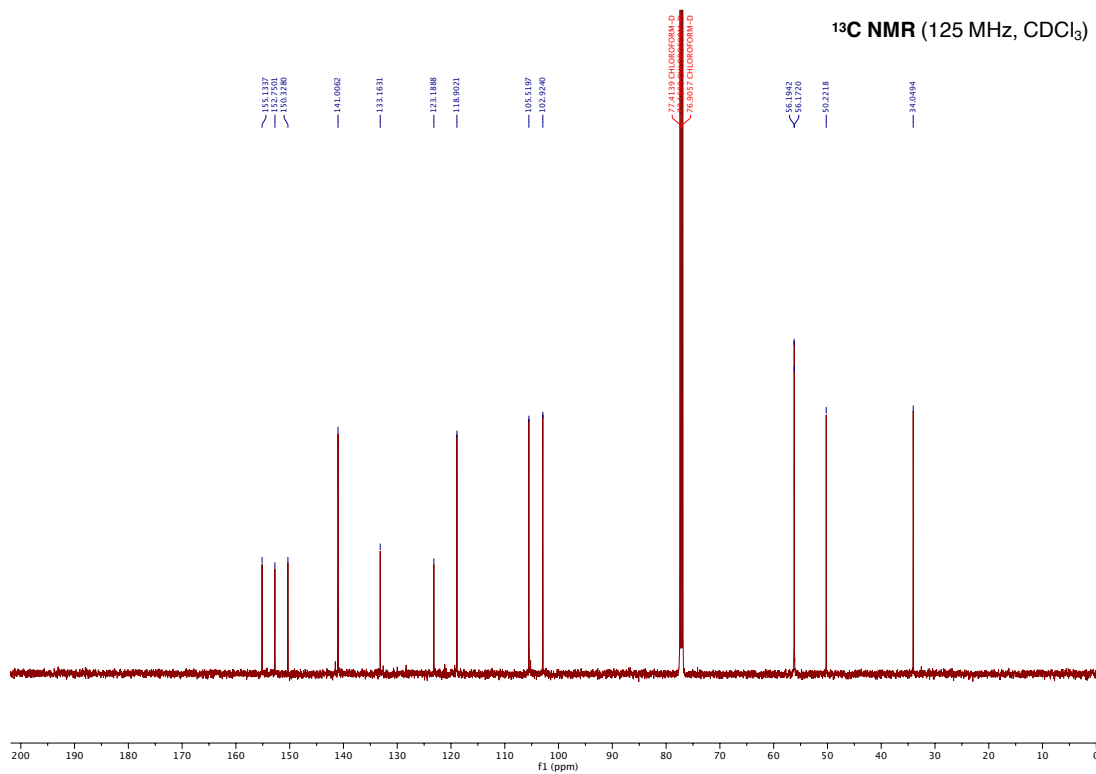

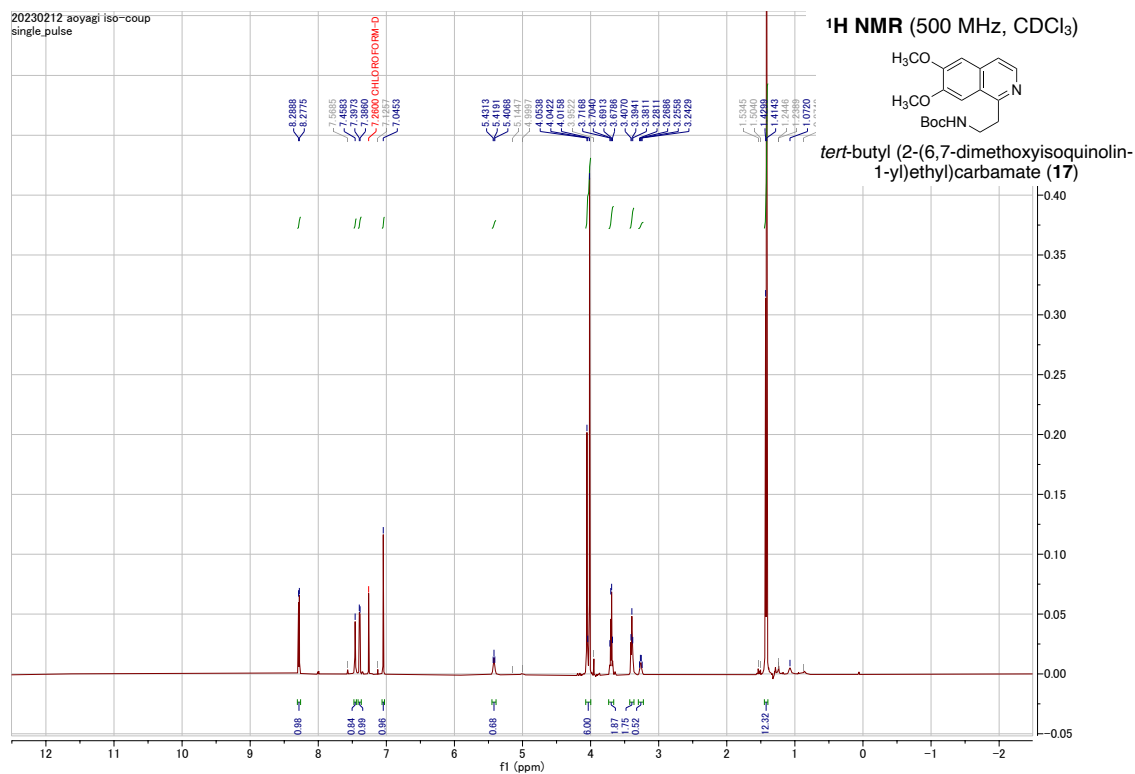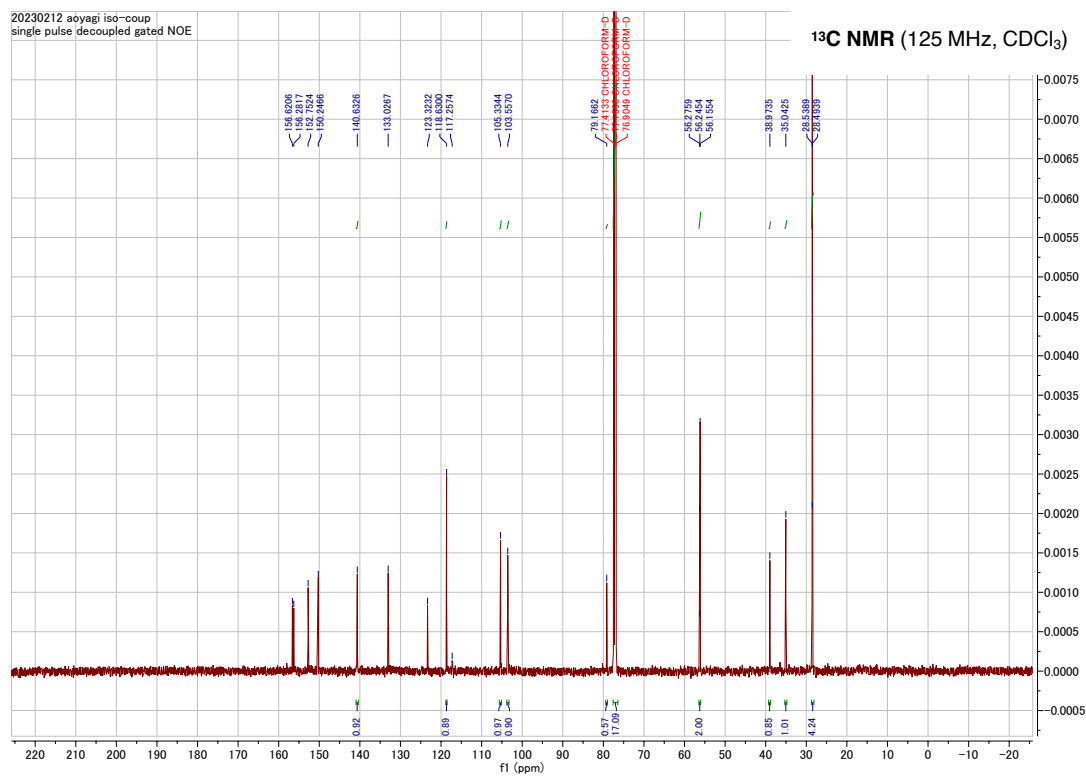

Supplement: s1 [file s1]
